# Supplementary material for: Genome-wide association study of Striga resistance in early maturing white tropical maize inbred lines
Source: PubMed Central journal article supplement (PMC7212567; doi:10.1186/s12870-020-02360-0), 2020-05-11

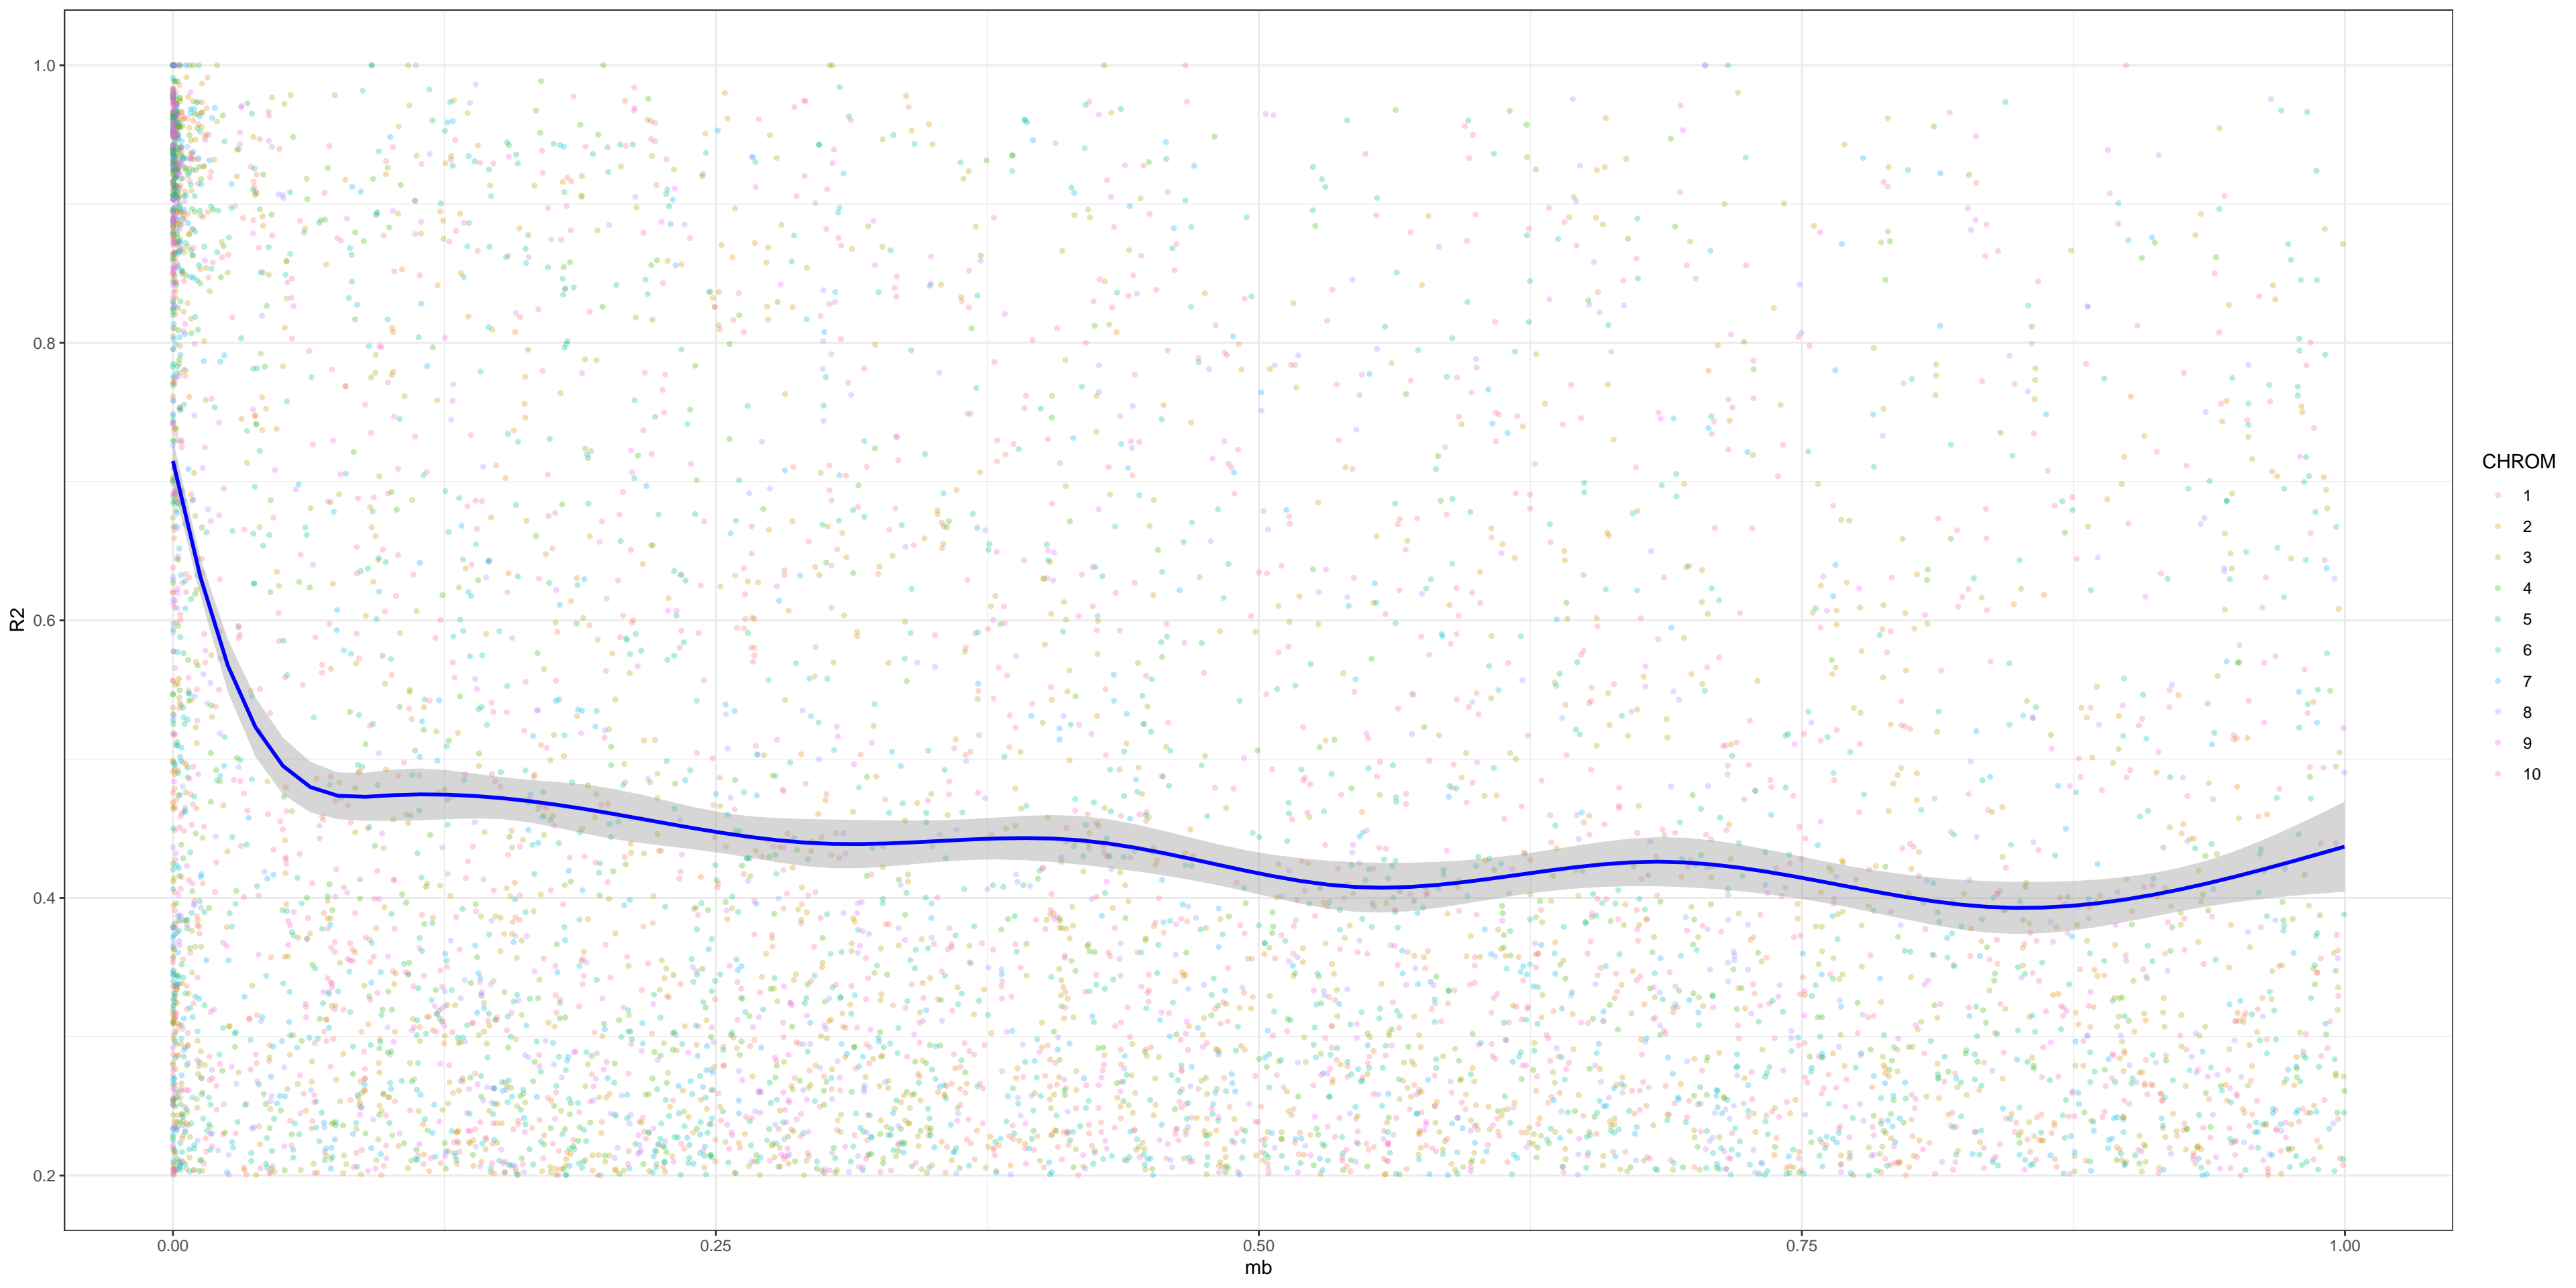

Supplement: 12870_2020_2360_MOESM3_ESM.pdf [file 12870_2020_2360_MOESM3_ESM.pdf]
